# Supplementary material
Source: PubMed Central journal article supplement (PMC3697972)
Supplement: a8cc67a53aa58b270acf41f9ea53c2eb_genetics.113.150755-5.pdf [file a8cc67a53aa58b270acf41f9ea53c2eb_genetics.113.150755-5.pdf]

**Table S1** The mapping family and three other families used to score genotypes of autosomal genes, putative PAR genes and sex-linked genes, and to estimate recombination fractions. One *S. vulgaris* family was used for comparative mapping.

| Family                                                     | Parental plants             |                        |                           |                           |
|------------------------------------------------------------|-----------------------------|------------------------|---------------------------|---------------------------|
|                                                            | Identity of ♀ parent        | Population of origin   | Identity of pollen donor  | Population of origin      |
| H2005-1 (F2 family)<br>(the “mapping family”) <sup>1</sup> | H2005-1/9 <sup>2</sup>      | F1                     | H2005-1/4                 | F1                        |
| G2008-3                                                    | K2005-12/2                  | Germany                | K2005-4/2                 | Heiligenstadt, Austria    |
| D2009-2                                                    |                             |                        | G2005-5/1                 | Loanninon, Greece         |
| G2008-9                                                    | K2005-4/3                   | Heiligenstadt, Austria | K2005-5B/1                | Oland, Grasingard Sweden  |
| J2010-1 (F2 family)                                        | Family F2009-1 female plant | F1 <sup>3</sup>        | Family F2009-1 male plant | F1 (as for female parent) |
| <i>S. vulgaris</i> SV2                                     | E2000-5/9 (female)          | Dijon, France          | 99K-10/4 (hermaphrodite)  | Sussex, England           |

<sup>1</sup> The mapping family is an F2 generated by crossing sibling plants descended from an F1 cross (family H2005-1) made by pollinating plant E2004-11/1 from Canche (Northern France) with E2004-17/1 (from River Waal, Netherlands). The other families from this study were obtained by crossing adult plants obtained from field-collected seeds.

<sup>2</sup> Identity of plants within families are indicated by the family name followed by the individual number (e.g. H2005-1/9 is individual 9 from family H2005-1).

<sup>3</sup> Female from the mapping family H2005-1 x male 11/5 from Madrid.
