# Supplementary material
Source: PubMed Central journal article supplement (PMC3697972)
Supplement: aa7231cc5d4f0c839d849c37b16ed915_genetics.113.150755-3.pdf [file aa7231cc5d4f0c839d849c37b16ed915_genetics.113.150755-3.pdf]

**Table S2** List of genes mapped to the 10 *S. latifolia* autosomes (denoted by LG1 to LG11) and sex chromosomes (LG12 and LG13). GenBank accession numbers are listed for sequences from Sanger sequencing of *S. latifolia* cDNA clones, and those for sequences from 454 sequencing and RNA-Seq are in the Transcriptome Shotgun Assembly (TSA) Database at DDBJ/EMBL/GenBank under the accession number GAKC00000000. The version described in this paper is the first version, GAKC01000000. Individual gene sequences are visible under this accession number. Three sequences of less than 200 bp are not in database (see below); primers and these sequences are available from the authors on request.

| Contig name     | Source         | Accession numbers of putative <i>A. thaliana</i> orthologues | <i>S. latifolia</i> linkage group | <i>S. latifolia</i> GenBank accession numbers |
|-----------------|----------------|--------------------------------------------------------------|-----------------------------------|-----------------------------------------------|
| Autosomal genes |                |                                                              |                                   |                                               |
| <i>E72</i>      | cDNA clone     | AT1G02150                                                    | LG1                               | KF034810                                      |
| <i>E246</i>     | 454 sequencing | AT5G19485                                                    | LG1                               |                                               |
| <i>E269</i>     | 454 sequencing | AT1G36980                                                    | LG1                               |                                               |
| <i>E271</i>     | 454 sequencing | AT2G30410                                                    | LG1                               |                                               |
| <i>E310</i>     | 454 sequencing | AT3G11945                                                    | LG1                               |                                               |
| <i>E312</i>     | 454 sequencing | AT3G51130                                                    | LG1                               |                                               |
| <i>E522</i>     | 454 sequencing | AT4G17600                                                    | LG1                               |                                               |
| <i>E546</i>     | 454 sequencing | AT3G51240                                                    | LG1                               |                                               |
| <i>E561</i>     | 454 sequencing | AT4G08150                                                    | LG1                               |                                               |
| <i>E568</i>     | 454 sequencing | AT2G35920                                                    | LG1                               |                                               |
| <i>E599</i>     | 454 sequencing | AT4G10140                                                    | LG1                               |                                               |
| <i>RB9</i>      | cDNA clone     | AT1G36980                                                    | LG1                               | KF034808                                      |
| <i>2A10</i>     | cDNA clone     | AT1G03900                                                    | LG2                               | KF034809                                      |
| <i>E98</i>      | cDNA clone     | AT4G10930                                                    | LG2                               | KF034811                                      |

|             |                |           |     |          |
|-------------|----------------|-----------|-----|----------|
| <i>E154</i> | 454 sequencing | AT2G33040 | LG2 |          |
| <i>E221</i> | 454 sequencing | AT4G17050 | LG2 |          |
| <i>E253</i> | 454 sequencing | AT4G02030 | LG2 |          |
| <i>E277</i> | 454 sequencing | AT3G27180 | LG2 |          |
| <i>E380</i> | 454 sequencing | AT4G02220 | LG2 |          |
| <i>E515</i> | 454 sequencing | AT4G17830 | LG2 |          |
| <i>E565</i> | 454 sequencing | AT4G01100 | LG2 |          |
| <i>E585</i> | 454 sequencing | AT1G80920 | LG2 |          |
| <i>E603</i> | 454 sequencing | AT1G71270 | LG2 |          |
| <i>1H12</i> | cDNA clone     | AT4G37930 | LG3 | KF034813 |
| <i>E39</i>  | cDNA clone     | AT5G56090 | LG3 | KF034812 |
| <i>E166</i> | 454 sequencing | AT2G39080 | LG3 |          |
| <i>E261</i> | 454 sequencing | AT4G14570 | LG3 |          |
| <i>E285</i> | 454 sequencing | AT5G14140 | LG3 |          |
| <i>E304</i> | 454 sequencing | AT5G13420 | LG3 |          |
| <i>E363</i> | 454 sequencing | AT3G52040 | LG3 |          |
| <i>E503</i> | 454 sequencing | AT1G67060 | LG3 |          |
| <i>E569</i> | 454 sequencing | AT5G14420 | LG3 |          |
| <i>E574</i> | 454 sequencing | AT3G04240 | LG3 |          |
| <i>E278</i> | 454 sequencing | AT1G04080 | LG4 |          |
| <i>E517</i> | 454 sequencing | AT2G40730 | LG4 |          |

|              |                |           |     |          |
|--------------|----------------|-----------|-----|----------|
| <i>E532</i>  | 454 sequencing | AT5G01990 | LG4 |          |
| <i>E536</i>  | 454 sequencing | AT1G03250 | LG4 |          |
| <i>E578</i>  | 454 sequencing | AT3G48425 | LG4 |          |
| <i>E354</i>  | 454 sequencing | AT2G39990 | LG4 |          |
| <i>2C10</i>  | cDNA clone     | AT3G55440 | LG4 | KF034815 |
| <i>RB14</i>  | cDNA clone     | AT3G46430 | LG4 | KF034814 |
| <i>E106</i>  | cDNA clone     | AT2G05170 | LG5 | KF034816 |
| <i>E155</i>  | 454 sequencing | AT3G10300 | LG5 |          |
| <i>E218</i>  | 454 sequencing | AT1G16210 | LG5 |          |
| <i>E227</i>  | 454 sequencing | AT4G33210 | LG5 |          |
| <i>E359</i>  | 454 sequencing | AT4G35250 | LG5 |          |
| <i>E554</i>  | 454 sequencing | AT5G22830 | LG5 |          |
| <i>E587</i>  | 454 sequencing | AT3G18940 | LG5 |          |
| <i>E634</i>  | 454 sequencing | AT3G55440 | LG5 |          |
| <i>E645</i>  | 454 sequencing | AT2G25737 | LG5 |          |
| <i>E224</i>  | 454 sequencing | AT4G13430 | LG6 |          |
| <i>E231</i>  | 454 sequencing | AT5G27560 | LG6 |          |
| <i>E233</i>  | 454 sequencing | AT5G63620 | LG6 |          |
| <i>E261b</i> | 454 sequencing | AT4G14570 | LG6 |          |
| <i>E341</i>  | 454 sequencing | AT5G22580 | LG6 |          |
| <i>E388</i>  | 454 sequencing | AT2G48070 | LG6 |          |

|             |                |           |     |          |
|-------------|----------------|-----------|-----|----------|
| <i>E391</i> | 454 sequencing | AT5G54770 | LG6 |          |
| <i>E514</i> | 454 sequencing | AT3G15520 | LG6 |          |
| <i>E528</i> | 454 sequencing | AT1G08200 | LG6 |          |
| <i>E547</i> | 454 sequencing | AT1G63900 | LG6 |          |
| <i>E579</i> | 454 sequencing | AT1G08370 | LG6 |          |
| <i>E584</i> | 454 sequencing | ATG55640  | LG6 |          |
| <i>E605</i> | 454 sequencing | AT5G10920 | LG6 |          |
| <i>E612</i> | 454 sequencing | AT3G20390 | LG6 |          |
| <i>E203</i> | 454 sequencing | AT4G29830 | LG7 |          |
| <i>E336</i> | 454 sequencing | AT4G15180 | LG7 |          |
| <i>E360</i> | 454 sequencing | AT5G51150 | LG7 |          |
| <i>E382</i> | 454 sequencing | AT1G21065 | LG7 |          |
| <i>E386</i> | 454 sequencing | AT1G12230 | LG7 |          |
| <i>E548</i> | 454 sequencing | AT3G17210 | LG7 |          |
| <i>E575</i> | 454 sequencing | AT2G25730 | LG7 |          |
| <i>E614</i> | 454 sequencing | AT2G04550 | LG7 |          |
| <i>RB7</i>  | cDNA clone     | AT3G26070 | LG7 | KF034817 |
| <i>E272</i> | 454 sequencing | AT4G27600 | LG8 |          |
| <i>E393</i> | 454 sequencing | AT4G12800 | LG8 |          |
| <i>E502</i> | 454 sequencing | AT2G33255 | LG8 |          |
| <i>E519</i> | 454 sequencing | AT1G08520 | LG8 |          |

|             |                |           |     |                                |
|-------------|----------------|-----------|-----|--------------------------------|
| <i>E572</i> | 454 sequencing | AT1G66730 | LG8 |                                |
| <i>E577</i> | 454 sequencing | AT3G27460 | LG8 |                                |
| <i>E611</i> | 454 sequencing | AT2G45290 | LG8 |                                |
| <i>3C8</i>  | cDNA clone     | AT5G14030 | LG9 | KF034819                       |
| <i>NAP</i>  | cDNA clone     | AT2G35110 | LG9 | Short sequence not in database |
| <i>E157</i> | 454 sequencing | AT1G1400  | LG9 |                                |
| <i>E165</i> | 454 sequencing | AT2G25110 | LG9 |                                |
| <i>E167</i> | 454 sequencing | AT4G34450 | LG9 | Short sequence not in database |
| <i>E215</i> | 454 sequencing | AT1G24310 | LG9 |                                |
| <i>E229</i> | 454 sequencing | AT1G80410 | LG9 |                                |
| <i>E344</i> | 454 sequencing | AT4G33640 | LG9 |                                |
| <i>E242</i> | 454 sequencing | AT3G47460 | LG9 |                                |
| <i>E252</i> | 454 sequencing | AT1G27530 | LG9 |                                |
| <i>E279</i> | 454 sequencing | AT5G11490 | LG9 |                                |
| <i>E281</i> | 454 sequencing | AT5G24710 | LG9 |                                |
| <i>E344</i> | 454 sequencing | AT4G33640 | LG9 |                                |
| <i>E351</i> | 454 sequencing | AT3G10940 | LG9 |                                |
| <i>E373</i> | 454 sequencing | AT2G03420 | LG9 |                                |
| <i>E513</i> | 454 sequencing | AT3G58140 | LG9 |                                |
| <i>E526</i> | 454 sequencing | AT1G30970 | LG9 |                                |
| <i>E534</i> | 454 sequencing | AT2G21280 | LG9 |                                |

|             |                |           |      |          |
|-------------|----------------|-----------|------|----------|
| <i>E30</i>  | cDNA clone     | AT2G45670 | LG10 | KF034821 |
| <i>E83</i>  | cDNA clone     | AT4G01560 | LG10 | KF034822 |
| <i>E160</i> | 454 sequencing | AT5G67590 | LG10 |          |
| <i>E239</i> | 454 sequencing | AT5G58030 | LG10 |          |
| <i>E249</i> | 454 sequencing | AT4G01560 | LG10 |          |
| <i>E288</i> | 454 sequencing | AT3G23490 | LG10 |          |
| <i>E314</i> | 454 sequencing | AT1G34000 | LG10 |          |
| <i>E323</i> | 454 sequencing | AT5G61510 | LG10 |          |
| <i>E504</i> | 454 sequencing | AT1G64850 | LG10 |          |
| <i>RB16</i> | cDNA clone     | AT2G06520 | LG10 | KF034820 |
| <i>E151</i> | 454 sequencing | AT1G30580 | LG11 |          |
| <i>E213</i> | 454 sequencing | AT3G24530 | LG11 |          |
| <i>E234</i> | 454 sequencing | AT1G01860 | LG11 |          |
| <i>E266</i> | 454 sequencing | AT3G23620 | LG11 |          |
| <i>E287</i> | 454 sequencing | AT2G45990 | LG11 |          |
| <i>E308</i> | 454 sequencing | AT5G09650 | LG11 |          |
| <i>E327</i> | 454 sequencing | AT5G11980 | LG11 |          |
| <i>E356</i> | 454 sequencing | AT1G47640 | LG11 |          |
| <i>E505</i> | 454 sequencing | AT1G20810 | LG11 |          |
| <i>E506</i> | 454 sequencing | AT4G04930 | LG11 |          |
| <i>E560</i> | 454 sequencing | AT5G25760 | LG11 |          |

|                                   |                |           |      |                                |
|-----------------------------------|----------------|-----------|------|--------------------------------|
| <i>RB15</i>                       | cDNA clone     | AT5G20240 | LG11 | KF034823                       |
| Sex chromosomes, fully sex-linked |                |           |      |                                |
| <i>E247</i>                       | 454 sequencing | AT2G01490 | LG12 |                                |
| <i>E316</i>                       | 454 sequencing | AT3G63140 | LG12 |                                |
| <i>E330</i>                       | 454 sequencing | AT3G32930 | LG12 |                                |
| <i>E521</i>                       | 454 sequencing | AT4G27450 | LG12 |                                |
| <i>E523</i>                       | 454 sequencing | AT5G55220 | LG12 |                                |
| <i>SlCypX</i>                     | cDNA clone     | AT3G44600 | LG12 | DV768216                       |
| <i>SlCytX</i>                     | cDNA clone     | AT1G26340 | LG12 | Short sequence not in database |
| <i>SIX3</i>                       | cDNA clone     | AT5G66210 | LG12 | ACB86624                       |
| <i>SIX4</i>                       | cDNA clone     | AT3G26780 | LG12 | ACB86605                       |
| <i>SIX6A</i>                      | cDNA clone     | AT2G34570 | LG12 | DV768271                       |
| <i>SIX6B</i>                      | cDNA clone     | AT2G34570 | LG12 | DV768271                       |
| <i>SIX7</i>                       | cDNA clone     | AT5G48020 | LG12 | DV768352                       |
| <i>SIX9</i>                       | cDNA clone     | AT1G08380 | LG12 | HM141608–HM141717              |
| <i>E707X</i>                      | 454 sequencing | AT3G27090 | LG12 |                                |
| <i>E711X</i>                      | 454 sequencing | AT4G35770 | LG12 |                                |
| <i>E713X</i>                      | 454 sequencing | AT5G42190 | LG12 |                                |
| <i>E378X</i>                      | 454 sequencing | AT4G30600 | LG12 |                                |
| <i>E777X</i>                      | RNAseq         | AT2G29690 | LG12 |                                |
| <i>E779X</i>                      | RNAseq         | AT3G46980 | LG12 |                                |

|                      |                |           |      |
|----------------------|----------------|-----------|------|
| <i>E780X</i>         | RNAseq         | AT1G79620 | LG12 |
| <i>E799X</i>         | RNAseq         | AT3G49880 | LG12 |
| <i>E807X</i>         | RNAseq         | AT1G65950 | LG12 |
| <i>E559X</i>         | 454 sequencing | AT3G21865 | LG12 |
| <i>E162</i>          | 454 sequencing | AT1G78900 | LG13 |
| Partially sex-linked |                |           |      |
| <i>E352</i>          | 454 sequencing | AT2G43640 | LG12 |
| <i>E200</i>          | 454 sequencing | AT5G06160 | LG12 |
| <i>E241</i>          | 454 sequencing | AT4G27700 | LG12 |
| <i>E284</i>          | 454 sequencing | AT5G52440 | LG12 |
| <i>E219</i>          | 454 sequencing | AT2G13360 | LG12 |
| <i>E592</i>          | 454 sequencing | AT3G22960 | LG12 |

---
