# Supplementary material
Source: PubMed Central journal article supplement (PMC3697972)

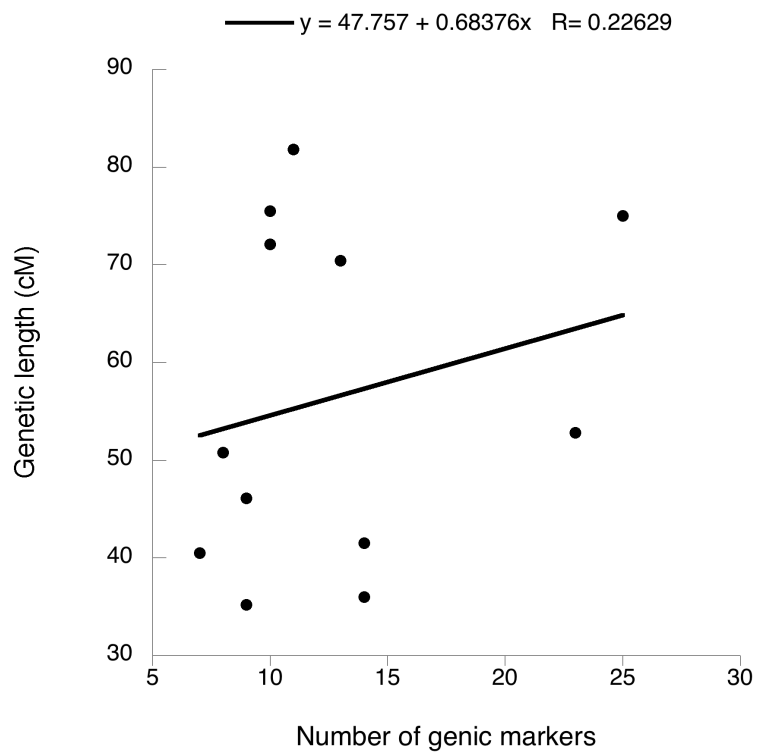

**Figure S1** Genetic lengths of linkage groups and numbers of genic markers.

Supplement: ba55f5e19ad01a7136917b6717326603_genetics.113.150755-4.pdf [file ba55f5e19ad01a7136917b6717326603_genetics.113.150755-4.pdf]
